# Supplementary material for: A pacs-type metal–organic framework with high adsorption capacity for inverse C2H6/C2H4 separation
Source: Royal Society of Chemistry journal article supplement (doi:10.1039/d4nj00605d), 2024-01-01
Supplement: d4nj00605d1.pdf [file d4nj00605d1.pdf]

## ***Electronic Supplementary Information for***

### **A *pac*s-type metal-organic framework with high adsorption capacity for inverse C<sub>2</sub>H<sub>6</sub>/C<sub>2</sub>H<sub>4</sub> separation**

Kuo Zhang,<sup>a</sup> Jing-Jing Pang,<sup>a</sup> Xin Lian,<sup>a</sup> Zi-Han Song,<sup>a</sup> Yue-Chao Yuan,<sup>a</sup> Hongliang Huang,<sup>\*b</sup>

Zhao-Quan Yao,<sup>\*c</sup> and Jian Xu<sup>\*a</sup>

<sup>a</sup>*School of Materials Science and Engineering, Smart Sensing Interdisciplinary Science Center, TKL of Metal and Molecule-Based Material Chemistry, Nankai University, Tianjin 300350, China. Email: jxu@nankai.edu.cn*

<sup>b</sup>*School of Chemistry and Chemical Engineering, Tiangong University, Tianjin 300387, China. Email: huanghongliang@tiangong.edu.cn.*

<sup>c</sup>*School of Chemistry and Chemical Engineering, Tianjin University of Technology, Tianjin 300384, China. Email: yaozq@email.tjut.edu.cn.*

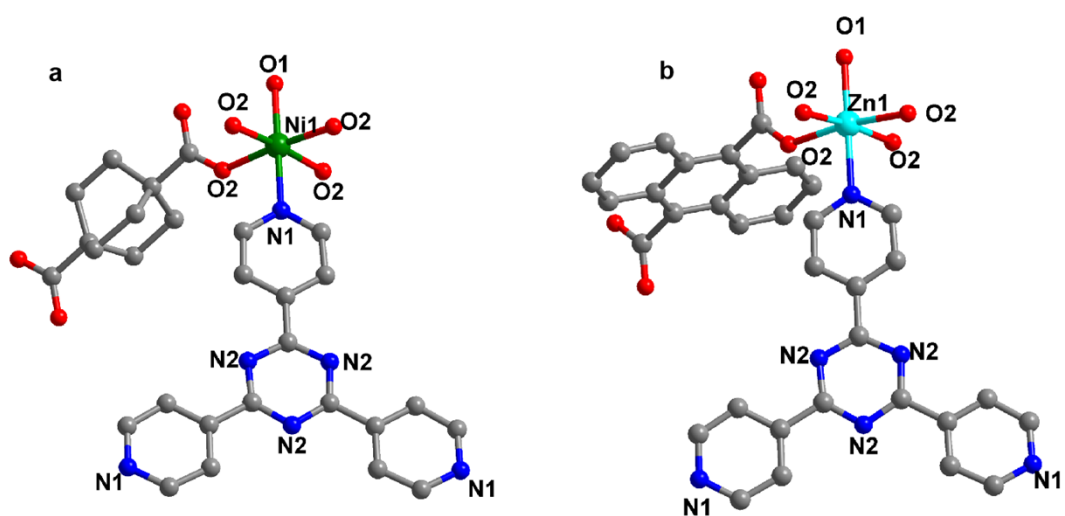

**Fig. S1** (a) Coordination environment of  $\text{Ni}^{2+}$  ion in Ni-bodc-tpt. (b) Coordination environment of  $\text{Zn}^{2+}$  ion in Zn-adc-tpt. Hydrogen atoms are omitted, for clarity.

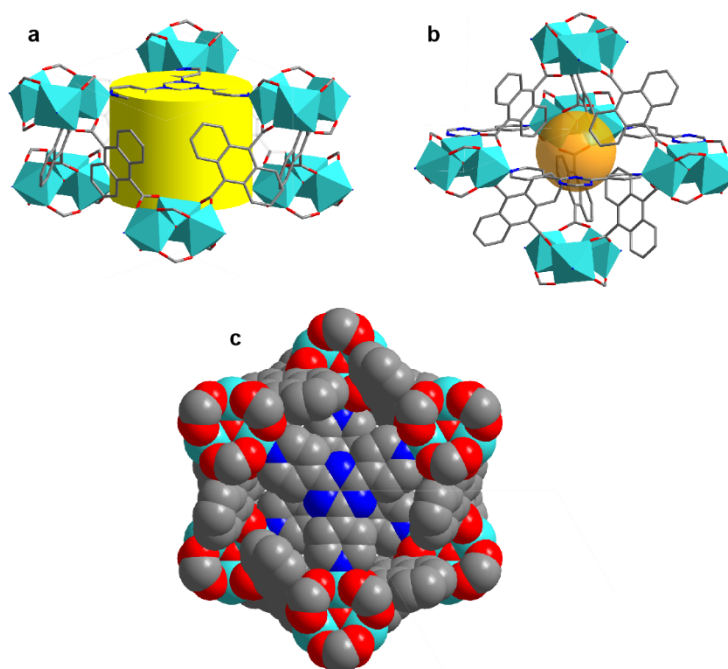

**Fig. S2** (a and b) Cage A and B of Zn-adc-tpt. (c) View of the space-filling picture of Zn-adc-tpt along the  $c$  axis.

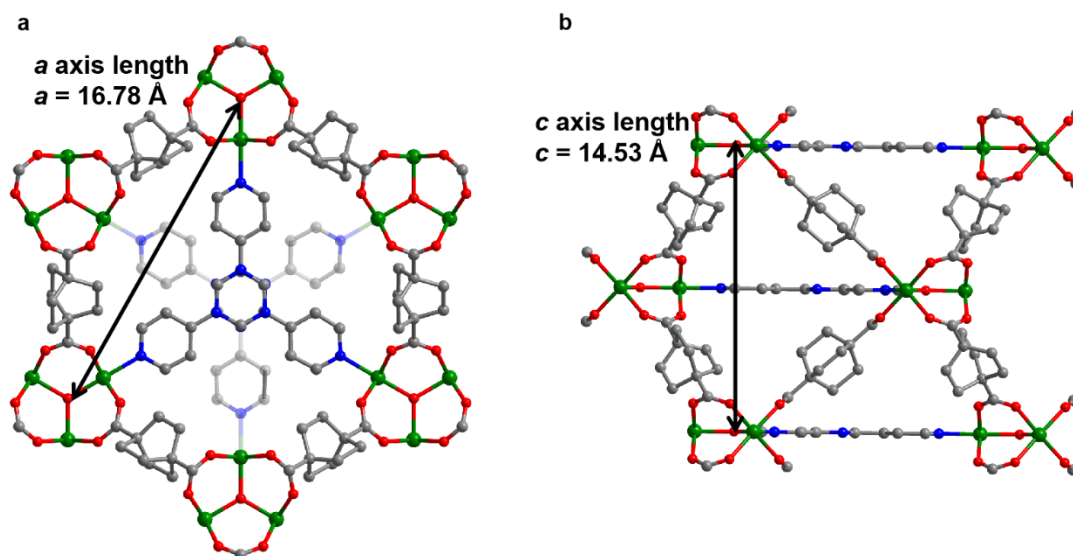

**Fig. S3** (a) The horizontal distance between the  $\mu_3$ -OH of the metal trimer SBU equal to the length of *a* axis. (b) The vertical distance between the  $\mu_3$ -OH of the metal trimer SBU equal to the length of *c* axis.

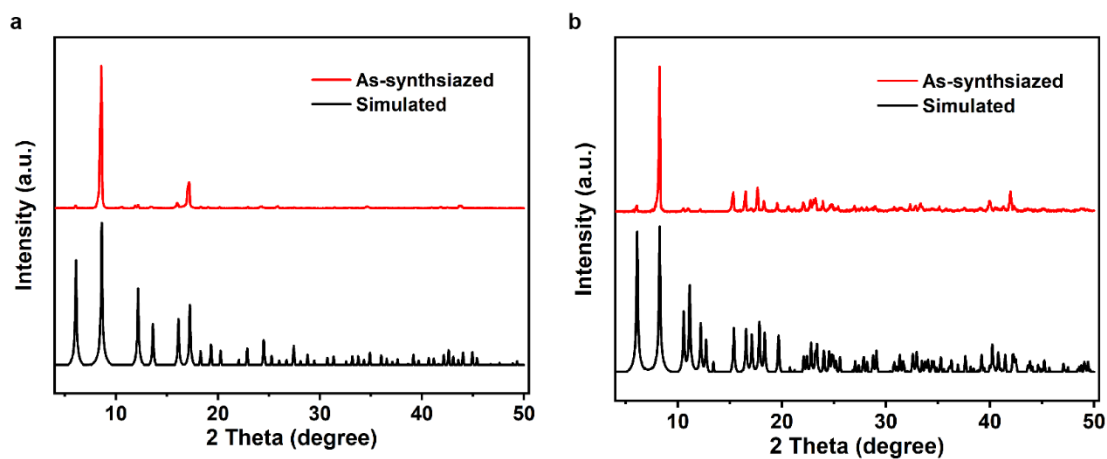

**Fig. S4** PXRD data of Ni-bodc-tpt (a) and Zn-adc-tpt (b)

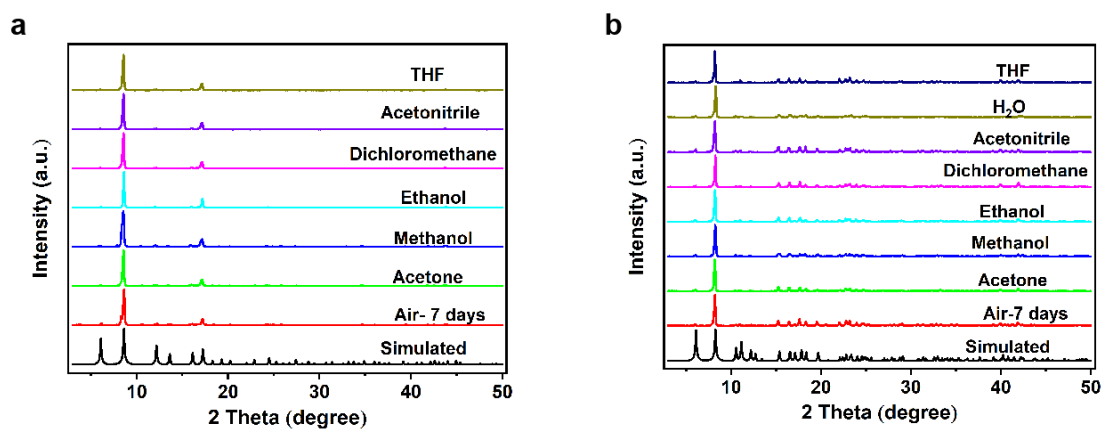

**Fig. S5** PXRD patterns of Ni-bodc-tpt (a) and Zn-adc-tpt (b) after being soaked in different organic solvents for 24 h and exposure to air for 7 days.

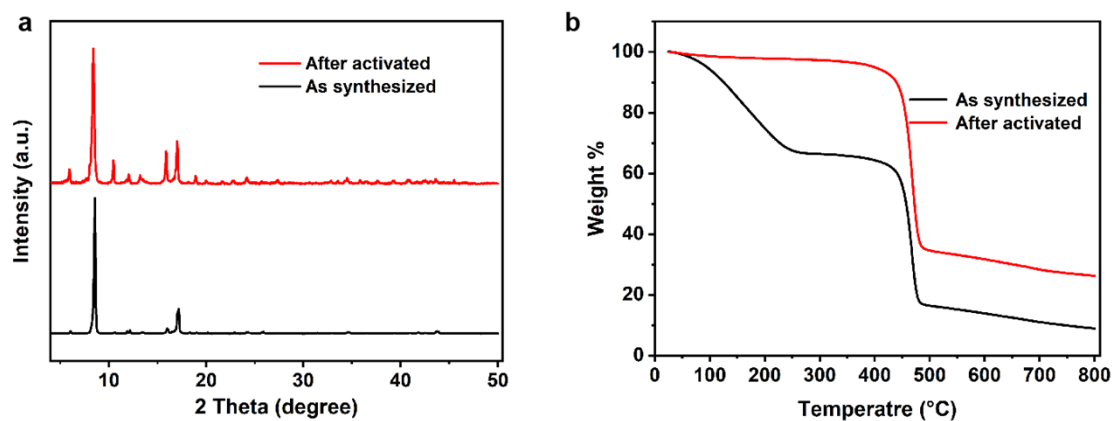

**Fig. S6** PXRD data (a) and TGA curves (b) of the as-synthesized and activated samples of Ni-bodc-tpt.

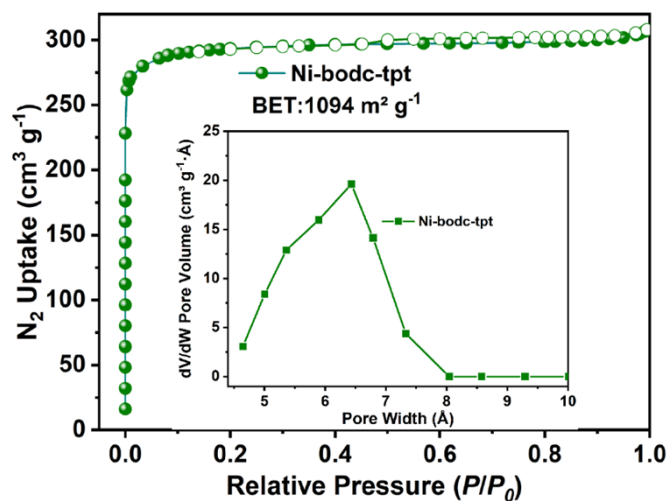

**Fig. S7**  $N_2$  adsorption-desorption isotherm on Ni-bodc-tpt at 77 K. Inset: the pore size distribution.

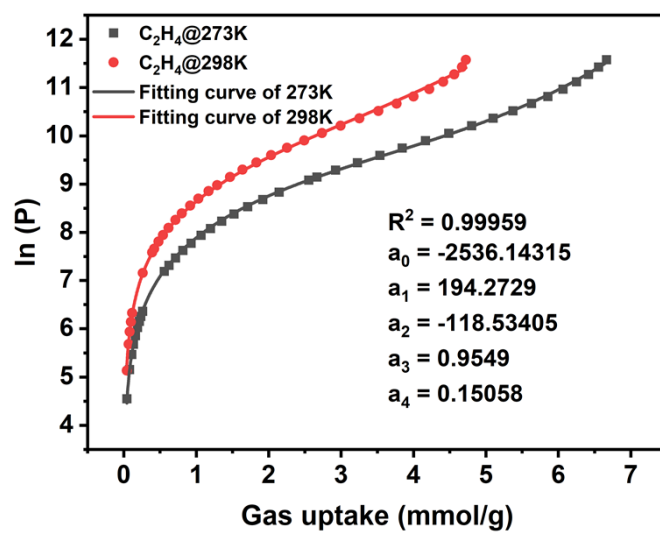

**Fig. S8** Virial equation fitting of  $C_2H_4$  adsorption isotherm of Ni-bodc-tpt at 273 and 298 K respectively.

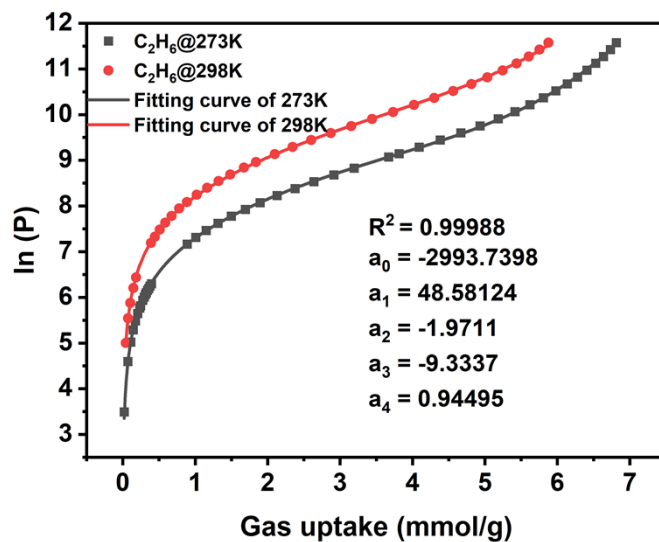

**Fig. S9** Virial equation fitting of C<sub>2</sub>H<sub>6</sub> adsorption isotherm of Ni-bodc-tpt at 273 and 298 K respectively.

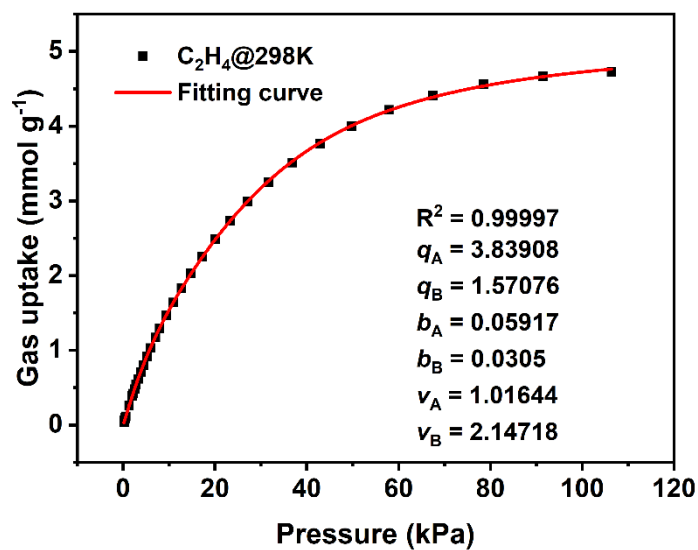

**Fig. S10** Dual-site Langmuir-Freundlich fitting of C<sub>2</sub>H<sub>4</sub> adsorption isotherm at 298 K for Ni-bodc-tpt.

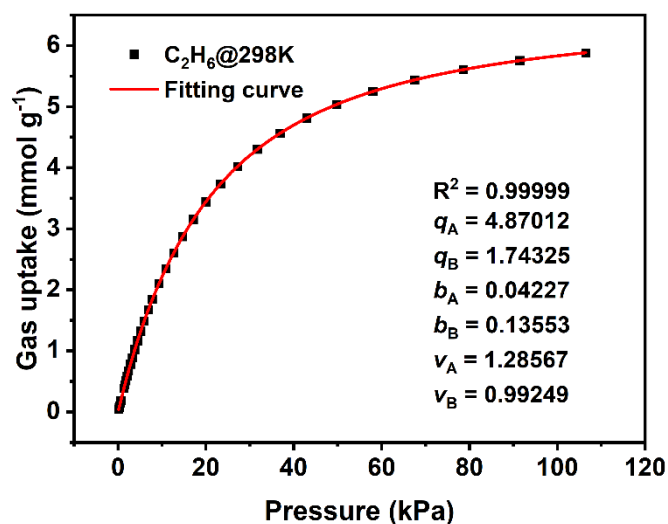

Fig. S11 Dual-site Langmuir-Freundlich fitting of C<sub>2</sub>H<sub>6</sub> adsorption isotherm at 298 K for Ni-bodc-tpt.

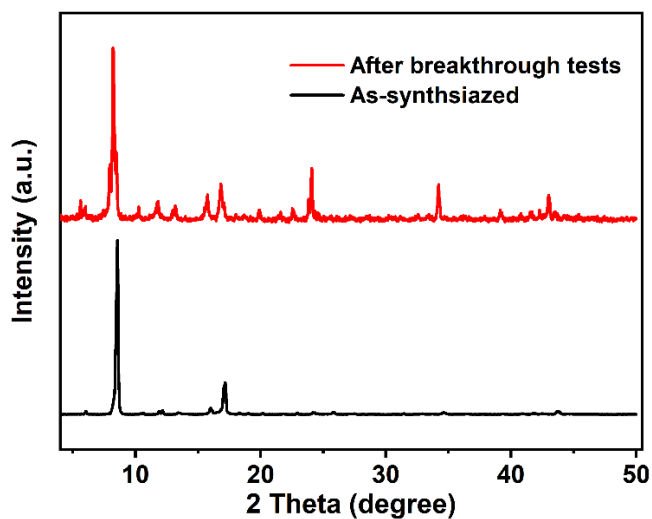

Fig. S12 PXRD of Ni-bodc-tpt after breakthrough tests.

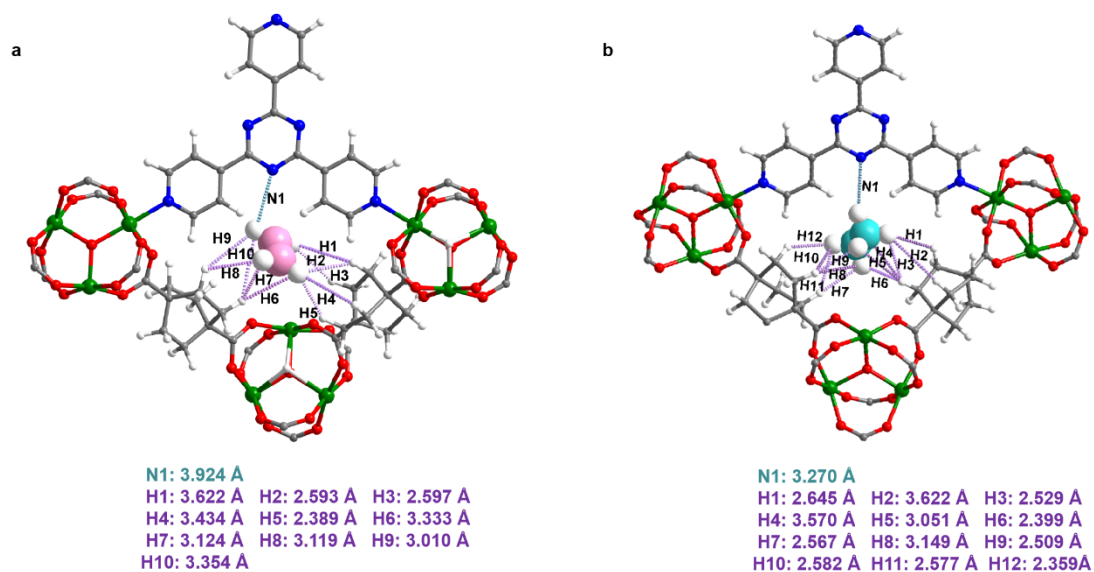

**Fig. S13** Predicted adsorption sites and interactions of  $C_2H_4$  (a) and  $C_2H_6$  (b) in cage A of Ni-bodcpt. The blue dashed lines refer to  $C-H\cdots N$  interactions while the purple ones refer to  $C-H\cdots H$  interactions.



**Table S1** Crystal data and structure refinement parameters for Ni-bodc-tp<sub>t</sub>.

| Compound                                                         | Ni-bodc-tp <sub>t</sub>                                                        |
|------------------------------------------------------------------|--------------------------------------------------------------------------------|
| CCDC number                                                      | 2329063                                                                        |
| Chemical formula                                                 | C <sub>48</sub> H <sub>48</sub> N <sub>6</sub> Ni <sub>3</sub> O <sub>13</sub> |
| Crystal system                                                   | Hexagonal                                                                      |
| Space group                                                      | <i>P</i> 6 <sub>3</sub> / <i>mmc</i>                                           |
| <i>a</i> /(Å)                                                    | 16.7926(6)                                                                     |
| <i>b</i> /(Å)                                                    | 16.7926(6)                                                                     |
| <i>c</i> /(Å)                                                    | 14.6396(9)                                                                     |
| <i>α</i> (°)                                                     | 90                                                                             |
| <i>β</i> (°)                                                     | 90                                                                             |
| <i>γ</i> (°)                                                     | 120                                                                            |
| <i>V</i> /(Å <sup>3</sup> )                                      | 3575.2(3)                                                                      |
| <i>Z</i>                                                         | 2                                                                              |
| <i>D</i> /(g/cm <sup>3</sup> )                                   | 1.015                                                                          |
| <i>T</i> /K                                                      | 210                                                                            |
| <i>F</i> (000)                                                   | 1132                                                                           |
| Goodness-of-fit on <i>F</i> <sup>2</sup>                         | 1.173                                                                          |
| <i>R</i> <sub>1</sub> [ <i>I</i> > 2σ( <i>I</i> )] <sup>a</sup>  | 0.0689                                                                         |
| <i>R</i> <sub>1</sub> [all data] <sup>a</sup>                    | 0.0780                                                                         |
| <i>wR</i> <sub>2</sub> [ <i>I</i> > 2σ( <i>I</i> )] <sup>b</sup> | 0.2075                                                                         |
| <i>wR</i> <sub>2</sub> [all data] <sup>b</sup>                   | 0.2255                                                                         |

$${}^a R_1 = \sum ||F_o| - |F_c|| / \sum |F_o|; {}^b wR_2 = [\sum [w(F_o^2 - F_c^2)^2] / \sum w(F_o^2)^2]^{1/2}.$$

**Table S2** Crystal data and structure refinement parameters for Zn-adc-tpt.

| Compound                                                         | Zn-adc-tpt                                                                     |
|------------------------------------------------------------------|--------------------------------------------------------------------------------|
| CCDC number                                                      | 2329065                                                                        |
| Chemical formula                                                 | C <sub>66</sub> H <sub>39</sub> N <sub>6</sub> Zn <sub>3</sub> O <sub>13</sub> |
| Crystal system                                                   | Trigonal                                                                       |
| Space group                                                      | <i>P</i> -31                                                                   |
| <i>a</i> /(Å)                                                    | 16.7370(2)                                                                     |
| <i>b</i> /(Å)                                                    | 16.7370(2)                                                                     |
| <i>c</i> /(Å)                                                    | 15.8689(3)                                                                     |
| <i>α</i> (°)                                                     | 90                                                                             |
| <i>β</i> (°)                                                     | 90                                                                             |
| <i>γ</i> (°)                                                     | 120                                                                            |
| <i>V</i> /(Å <sup>3</sup> )                                      | 3849.75(12)                                                                    |
| <i>Z</i>                                                         | 2                                                                              |
| <i>D</i> /(g/cm <sup>3</sup> )                                   | 1.139                                                                          |
| <i>T</i> /K                                                      | 100                                                                            |
| <i>F</i> (000)                                                   | 1342                                                                           |
| Goodness-of-fit on F <sup>2</sup>                                | 1.045                                                                          |
| <i>R</i> <sub>1</sub> [ <i>I</i> > 2σ( <i>I</i> )] <sup>a</sup>  | 0.0524                                                                         |
| <i>R</i> <sub>1</sub> [all data] <sup>a</sup>                    | 0.0590                                                                         |
| <i>wR</i> <sub>2</sub> [ <i>I</i> > 2σ( <i>I</i> )] <sup>b</sup> | 0.1373                                                                         |
| <i>wR</i> <sub>2</sub> [all data] <sup>b</sup>                   | 0.1410                                                                         |

$${}^a R_1 = \sum ||F_o| - |F_c|| / \sum |F_o|; {}^b wR_2 = [\sum [w(F_o^2 - F_c^2)^2] / \sum w(F_o^2)^2]^{1/2}.$$

**Table S3** Comparison of adsorption metrics of some benchmark C<sub>2</sub>H<sub>6</sub>-selective MOFs at 298 K and 1 bar.

| MOF adsorbents                           | C <sub>2</sub> H <sub>6</sub> uptake (mmol g <sup>-1</sup> ) | C <sub>2</sub> H <sub>4</sub> uptake (mmol g <sup>-1</sup> ) | Selectivity (50/50, v/v) | Q <sub>st</sub> of C <sub>2</sub> H <sub>6</sub> (kJ mol <sup>-1</sup> ) | Ref.      |
|------------------------------------------|--------------------------------------------------------------|--------------------------------------------------------------|--------------------------|--------------------------------------------------------------------------|-----------|
| Ni-bdc-tpt                               | 5.87                                                         | 4.72                                                         | 1.8                      | 24.87                                                                    | This work |
| Fe <sub>2</sub> (O <sub>2</sub> )(dobdc) | 3.03                                                         | 1.9                                                          | 4.4                      | 66.8                                                                     | 1         |
| LIFM-63                                  | 2.89                                                         | 2.07                                                         | 1.56                     | 26.5                                                                     | 2         |
| Ni(bdc)(ted) <sub>0.5</sub>              | 5.0                                                          | 3.4                                                          | 1.85                     | 21.5                                                                     | 3         |
| JNU-2                                    | 4.11                                                         | 3.62                                                         | 1.6                      | 30                                                                       | 4         |
| MUF-15                                   | 4.69                                                         | 4.15                                                         | 1.96                     | 29.2                                                                     | 5         |
| TKL-106                                  | 5.61                                                         | 4.51                                                         | 1.5                      | 22.4                                                                     | 6         |
| MIL-142A                                 | 3.8                                                          | 2.9                                                          | 1.5                      | 27.2                                                                     | 7         |
| Cu(Qc) <sub>2</sub>                      | 1.85                                                         | 0.78                                                         | 3.4                      | 28.8                                                                     | 8         |
| NUM-7                                    | 2.85                                                         | 2.62                                                         | 1.764                    | 35.8                                                                     | 9         |
| SNNU-40                                  | 7.54                                                         | 4.91                                                         | 1.57                     | 18                                                                       | 10        |
| CPM-233                                  | 7.45                                                         | 6.52                                                         | 1.64                     | 27.3                                                                     | 11        |
| PCN-250(Fe <sub>2</sub> Co)              | 6.21                                                         | 5.82                                                         | 1.52                     | 22.2                                                                     | 12        |

## References

1. L. Li, R.-B. Lin, R. Krishna, H. Li, S. Xiang, H. Wu, J. Li, W. Zhou and B. Chen, *Science*, 2018, **362**, 443-446.
2. C. X. Chen, Z. W. Wei, T. Pham, P. C. Lan, L. Zhang, K. A. Forrest and S. Chen, *Angew. Chem. Int. Ed.*, 2021, **60**, 9680–9685.
3. W. Liang, F. Xu, X. Zhou, J. Xiao, Q. Xia, Y. Li and Z. Li, *Chem. Eng. Sci.*, 2016, **148**, 275–281.
4. H. Zeng, X. J. Xie, M. Xie, Y. L. Huang, D. Luo, T. Wang, Y. Zhao, W. Lu and D. Li, *J. Am. Chem. Soc.*, 2019, **141**, 20390–20396.
5. O. T. Qazvini, R. Babarao, Z. L. Shi, Y. B. Zhang and S. G. Telfer, *J. Am. Chem. Soc.*, 2019, **141**, 5014–5020.
6. M.-H. Yu, H. Fang, H.-L. Huang, M. Zhao, Z.-Y. Su, H.-X. Nie, Z. Chang and T.-L. Hu, *Small*, 2023, **19**, 2300821.
7. Y. Chen, H. Wu, D. Lv, R. Shi, Y. Chen, Q. Xia, Z. Li, *Ind. Eng. Chem. Res.*, 2018, **57**, 4063.
8. R.-B. Lin, H. Wu, L. Li, X.-L. Tang, Z. Li, J. Gao, H. Cui, W. Zhou, B. Chen, *J. Am. Chem. Soc.*, 2018, **140**, 12940.
9. F.-Z. Sun, S.-Q. Yang, R. Krishna, Y.-H. Zhang, Y.-P. Xia, T.-L. Hu, *ACS Appl. Mater. Interfaces*, 2020, **12**, 6105.
10. Y.-P. Li, Y.-N. Zhao, S.-N. Li, D.-Q. Yuan, Y.-C. Jiang, X. Bu, M.-C. Hu, Q.-G. Zhai, *Adv. Sci.*, 2021, **8**, 2003141.
11. H. Yang, Y. Wang, R. Krishna, X. Jia, Y. Wang, A. N. Hong, C. Dang, H. E. Castillo, X. Bu, P. Feng, *J. Am. Chem. Soc.*, 2020, **142**, 2222.
12. H. Wu, Y. Chen, Y. Yuan, D. Lv, S. Tu, Z. Liu, Z. Li, Q. Xia, *AIChE J.*, 2022, **68**, e17385
